# Supplementary material
Source: publisher figshare collection journal article supplement (https://asha.figshare.com/articles/dataset/_/11984364)
Supplement: Supplementary file 1 [file 1]

Supplemental Material S1  
Sample IPSyn Output

ipsyn +t\*CHI +leng +c 12037\_42MO.cha

ipsyn is conducting analyses on:

ONLY speaker main tiers matching: \*CHI;

and those speakers' ONLY dependent tiers matching: %MOR;; %GRA;;

\*\*\*\*\*

From file <12037\_42MO.cha>

\*\*\* Speaker: \*CHI:

12037\_42MO.cha      eng|weismer|CHI|3;6.|male|||Target\_Child|||

Rule: N1

File "12037\_42MO.cha": line 15.

Point1: n|closet

File "12037\_42MO.cha": line 23.

Point2: n|table

Score: 2

Rule: N6

File "12037\_42MO.cha": line 15.

Point1: prep|in det:art|the n|closet

File "12037\_42MO.cha": line 90.

Point2: v|put&ZERO det:art|the n|bed

Score: 2

Rule: N2

File "12037\_42MO.cha": line 7.

Point1: pro:per|it

File "12037\_42MO.cha": line 189.

Point2: pro:per|it~cop|be&3S

Score: 2

Rule: N7

File "12037\_42MO.cha": line 205.

Point1: n|plug-PL

File "12037\_42MO.cha": line 529.

Point2: n|chair-PL

Score: 2

Rule: N3

File "12037\_42MO.cha": line 15.

Point1: det:art|the

File "12037\_42MO.cha": line 74.

Point2: adj|right

Score: 2

Rule: N8

File "12037\_42MO.cha": line 35.

Point1: det:art|the n|mirror v|go

File "12037\_42MO.cha": line 74.

Point2: det:art|the n|person&PL v|sit

Score: 2

Rule: N4

File "12037\_42MO.cha": line 15.

Point1: det:art|the n|closet

File "12037\_42MO.cha": line 23.

Point2: det:art|the n|table

Score: 2

Rule: N9

File "12037\_42MO.cha": line 351.

Point1: det:art|the adj|big n|table

Score: 1

Rule: N5

File "12037\_42MO.cha": line 15.

Point1: det:art|the n|closet

File "12037\_42MO.cha": line 23.

Point2: det:art|the n|table

Score: 2

Rule: N10

File "12037\_42MO.cha": line 74.

Point1: adv|here adj|right

File "12037\_42MO.cha": line 370.

Point2: adv|down adj|low

Score: 2

Rule: N11

Score: 0

Rule: V1

File "12037\_42MO.cha": line 7.

Point1: v|set&ZERO

File "12037\_42MO.cha": line 15.

Point2: v|go-3S

Score: 2

Rule: V2

File "12037\_42MO.cha": line 15.

Point1: prep|in

File "12037\_42MO.cha": line 27.

Point2: prep|like

Score: 2

Rule: V3

File "12037\_42MO.cha": line 15.

Point1: prep|in det:art|the n|closet

File "12037\_42MO.cha": line 102.

Point2: prep|to n|bed

Score: 2

Rule: V4

Score: 0

Rule: V5

File "12037\_42MO.cha": line 576.

Point1: mod:aux|gonna v|go

Score: 1

Rule: V6

File "12037\_42MO.cha": line 117.

Point1: ~aux|be&1S part|go-PRESP

File "12037\_42MO.cha": line 622.

Point2: ~aux|be&3S part|work-PRESP

Score: 2

Rule: V7

File "12037\_42MO.cha": line 117.

Point1: part|go-PRESP

File "12037\_42MO.cha": line 189.

Point2: part|make-PRESP

Score: 2

Rule: V8

File "12037\_42MO.cha": line 7.

Point1: adv|up

File "12037\_42MO.cha": line 35.

Point2: adv|right

Score: 2

Rule: V9

File "12037\_42MO.cha": line 102.

Point1: mod|can v|go

File "12037\_42MO.cha": line 174.

Point2: mod|can v|see

Score: 2

Rule: V10

File "12037\_42MO.cha": line 15.

Point1: v|go-3S

File "12037\_42MO.cha": line 370.

Point2: v|eat-3S

Score: 2

Rule: V11

File "12037\_42MO.cha": line 90.

Point1: mod|should

Score: 1

Rule: V12

Score: 0

Rule: V13

File "12037\_42MO.cha": line 553.

Point1: mod|do&PAST

File "12037\_42MO.cha": line 724.

Point2: aux|be&PAST&13S

Score: 2

Rule: V14

File "12037\_42MO.cha": line 666.

Point1: adv|just v|go-3S

Score: 1

Rule: V15

File "12037\_42MO.cha": line 102.

Point1: mod|can

File "12037\_42MO.cha": line 166.

Point2: cop|be&3S

Score: 2

Rule: V16

File "12037\_42MO.cha": line 453.

Point1: cop|be&PAST&13S

Score: 1

Rule: V17

Score: 0

Rule: Q1

ADD: score: 2

Score: 2

Rule: Q2

ADD: score: 2

Score: 2

Rule: Q3

File "12037\_42MO.cha": line 189.

Point1: neg|not

Score: 1

Rule: Q4

File "12037\_42MO.cha": line 90.

Point1: adv:int|where v|put&ZERO

File "12037\_42MO.cha": line 221.

Point2: pro:int|who v|put&ZERO

Score: 2

Rule: Q5

File "12037\_42MO.cha": line 253.

Point1: pro:per|it ~neg|not v|come

Score: 1

Rule: Q6

File "12037\_42MO.cha": line 90.

Point1: adv:int|where mod|should

File "12037\_42MO.cha": line 472.

Point2: pro:int|what mod|do

Score: 2

Rule: Q7

File "12037\_42MO.cha": line 189.

Point1: ~cop|be&3S neg|not

File "12037\_42MO.cha": line 253.

Point2: mod|do&3S ~neg|not

Score: 2

Rule: Q8

File "12037\_42MO.cha": line 166.

Point1: cop|be&3S n|light

File "12037\_42MO.cha": line 345.

Point2: cop|be&3S det:art|the n|table

Score: 2

Rule: Q9

Score: 0

Rule: Q10

Score: 0

Rule: Q11

File "12037\_42MO.cha": line 401.

Point1: mod|do&3S ~neg|not pro:per|it

Score: 1

Rule: S1

File "12037\_42MO.cha": line 7.

Point1: v|set&ZERO pro:per|it

File "12037\_42MO.cha": line 15.

Point2: pro:dem|this v|go-3S

Score: 2

Rule: S2

File "12037\_42MO.cha": line 15.

Point1: pro:dem|this v|go-3S

File "12037\_42MO.cha": line 35.

Point2: n|mirror v|go

Score: 2

Rule: S3

File "12037\_42MO.cha": line 7.

Point1: v|set&ZERO pro:per|it

File "12037\_42MO.cha": line 90.

Point2: v|put&ZERO det:art|the n|bed

Score: 2

Rule: S4

File "12037\_42MO.cha": line 370.

Point1: n|dad v|say&PAST pro:per|it

File "12037\_42MO.cha": line 494.

Point2: pro:per|you v|put&ZERO det:art|the  
n|+adj|high+n|chair

Score: 2

Rule: S5

File "12037\_42MO.cha": line 27.

Point1: coord|and

Score: 1

Rule: S6

File "12037\_42MO.cha": line 174.

Point1: v|go-3S v|see

File "12037\_42MO.cha": line 370.

Point2: v|eat-3S v|say&PAST

Score: 2

Rule: S7  
File "12037\_42MO.cha": line 174.  
Point1: v|go-3S conj|so v|see  
File "12037\_42MO.cha": line 370.  
Point2: v|eat-3S conj|because v|say&PAST  
Score: 2

Rule: S8  
File "12037\_42MO.cha": line 591.  
Point1: inf|to  
Score: 1

Rule: S9  
Score: 0

Rule: S10  
File "12037\_42MO.cha": line 102.  
Point1: conj|so  
File "12037\_42MO.cha": line 253.  
Point2: conj|but  
Score: 2

Rule: S11  
File "12037\_42MO.cha": line 109.  
Point1: part|tire-PASTP  
File "12037\_42MO.cha": line 383.  
Point2: cop|be&3S  
Score: 2

Rule: S12  
File "12037\_42MO.cha": line 102.  
Point1: pro:dem|that conj|so pro:sub|they  
File "12037\_42MO.cha": line 174.  
Point2: n|light conj|so pro:sub|they  
Score: 2

Rule: S13  
File "12037\_42MO.cha": line 351.  
Point1: pro:rel|where det:art|the adj|big  
n|person&PL  
File "12037\_42MO.cha": line 490.  
Point2: pro:rel|where det:art|the n|bed  
Score: 2

Rule: S14  
Score: 0

Rule: S15  
File "12037\_42MO.cha": line 370.  
Point1: v|eat-3S v|say&PAST v|eat-3S  
File "12037\_42MO.cha": line 724.  
Point2: v|take&PAST part|do&PASTP part|eat-  
PRES  
Score: 2

Rule: S16  
File "12037\_42MO.cha": line 717.  
Point1: part|do&PASTP  
Score: 1

Rule: S17  
File "12037\_42MO.cha": line 109.  
Point1: part|tire-PASTP  
File "12037\_42MO.cha": line 383.  
Point2: cop|be&3S  
Score: 2

Rule: S18  
Score: 0

Rule: S19  
File "12037\_42MO.cha": line 253.  
Point1: conj|but  
File "12037\_42MO.cha": line 788.  
Point2: conj|because  
Score: 2

Rule: S20  
File "12037\_42MO.cha": line 717.  
Point1: aux|be&3S part|do&PASTP  
Score: 1

N = 19

V = 24

Q = 15

S = 30

Total = 88
