# Supplementary material
Source: publisher figshare collection journal article supplement (https://asha.figshare.com/articles/dataset/_/11984364)
Supplement: Supplementary file 2 [file 1]

## Supplemental Material S2 CLAN Sample Transcript

## CLAN SAMPLE TRANSCRIPT (usable child utterances only)

|   |                                                                                                                                                                           | Structure                                                       | Point                                                                                                                                                                                                                                                                                                                                                            |
|---|---------------------------------------------------------------------------------------------------------------------------------------------------------------------------|-----------------------------------------------------------------|------------------------------------------------------------------------------------------------------------------------------------------------------------------------------------------------------------------------------------------------------------------------------------------------------------------------------------------------------------------|
| 1 | *CHI: set it up .<br>%mor: v   set&ZERO pro:per   it adv   up .<br>%gra: 1 0 ROOT 2 1 OBJ 3 1 JCT 4 1 PUNCT                                                               | N2<br>V1<br>V8<br>S1<br>S3                                      | Point1: pro:per   it<br>Point1: v   set&ZERO<br>Point1: adv   up<br>Point1: v   set&ZERO pro:per   it<br>Point1: v   set&ZERO pro:per   it                                                                                                                                                                                                                       |
| 2 | *CHI: this goes in the closet .<br>%mor: pro:dem   this v   go-3S prep   in det:art   the n   closet .<br>%gra: 1 2 SUBJ 2 0 ROOT 3 2 JCT 4 5 DET 5 3 POBJ 6 2 PUNCT      | N1<br>N3<br>N4<br>N5<br>N6<br>V1<br>V2<br>V3<br>V10<br>S1<br>S2 | Point1: n   closet<br>Point1: det:art   the<br>Point1: prep   in det:art   the n   closet<br>Point1: det:art   the n   closet<br>Point1: prep   in det:art   the n   closet<br>Point2: v   go-3S<br>Point1: prep   in<br>Point1: prep   in det:art   the n   closet<br>Point1: v   go-3S<br>Point2: pro:dem   this v   go-3S<br>Point1: pro:dem   this v   go-3S |
| 3 | *CHI: the table .<br>%mor: det:art   the n   table .<br>%gra: 1 2 DET 2 0 INCROOT 3 2 PUNCT                                                                               | N1<br>N4<br>N5                                                  | Point2: n   table<br>Point2: det:art   the n   table<br>Point2: det:art   the n   table                                                                                                                                                                                                                                                                          |
| 4 | *CHI: and this goes like this .<br>%mor: coord   and pro:dem   this v   go-3S prep   like pro:dem   this .<br>%gra: 1 3 LINK 2 3 SUBJ 3 0 ROOT 4 3 JCT 5 4 POBJ 6 3 PUNCT | V2<br>S5                                                        | Point2: prep   like<br>Point1: coord   and                                                                                                                                                                                                                                                                                                                       |
| 5 | *CHI: the mirror .<br>%mor: det:art   the n   mirror .<br>%gra: 1 2 DET 2 0 INCROOT 3 2 PUNCT                                                                             |                                                                 |                                                                                                                                                                                                                                                                                                                                                                  |
| 6 | *CHI: the mirror go [* 0es] right here .<br>%mor: det:art   the n   mirror v   go adv   right adv   here .<br>%gra: 1 2 DET 2 3 SUBJ 3 0 ROOT 4 5 JCT 5 3 JCT 6 3 PUNCT   | N8<br>V8<br>S2                                                  | Point1: det:art   the n   mirror v   go<br>Point2: adv   right<br>Point2: n   mirror v   go                                                                                                                                                                                                                                                                      |
| 7 | *CHI: the mirror goes in here .<br>%mor: det:art   the n   mirror v   go-3S adv   in adv   here .                                                                         |                                                                 |                                                                                                                                                                                                                                                                                                                                                                  |

## CLAN SAMPLE TRANSCRIPT (usable child utterances only)

|    |                                                                                                                                                                                                                 | Structure                     | Point                                                                                                                                                                      |
|----|-----------------------------------------------------------------------------------------------------------------------------------------------------------------------------------------------------------------|-------------------------------|----------------------------------------------------------------------------------------------------------------------------------------------------------------------------|
|    | %gra: 1 2 DET 2 3 SUBJ 3 0 ROOT 4 3 JCT 5 3 JCT 6 3 PUNCT                                                                                                                                                       |                               |                                                                                                                                                                            |
| 8  | *CHI: the chair goes right here .<br>%mor: det:art the n chair v go-3S adv right adv here .<br>%gra: 1 2 DET 2 3 SUBJ 3 0 ROOT 4 5 JCT 5 3 JCT 6 3 PUNCT                                                        |                               |                                                                                                                                                                            |
| 9  | *CHI: the people sit right here right ?<br>%mor: det:art the n person&PL v sit adv right adv here adj right ?<br>%gra: 1 2 DET 2 3 SUBJ 3 0 ROOT 4 5 JCT 5 6 JCT 6 3 JCT 7 3 PUNCT                              | N3<br>N8<br>N10               | Point2: adj right<br>Point2: det:art the n person&PL v sit<br>Point1: adv here adj right                                                                                   |
| 10 | *CHI: &um where should we put the bed ?<br>%mor: adv:int where mod should pro:sub we v put&ZERO det:art the n bed ?<br>%gra: 1 4 LINK 2 4 AUX 3 4 SUBJ 4 0 ROOT 5 6 DET 6 4 OBJ 7 4 PUNCT                       | N6<br>V11<br>Q4<br>Q6<br>S3   | Point2: v put&ZERO det:art the n bed<br>Point1: mod should<br>Point1: adv:int where v put&ZERO<br>Point1: adv:int where mod should<br>Point2: v put&ZERO det:art the n bed |
| 11 | *CHI: right here ?<br>%mor: adv right adv here ?<br>%gra: 1 2 JCT 2 0 INCROOT 3 2 PUNCT                                                                                                                         |                               |                                                                                                                                                                            |
| 12 | *CHI: that's so they can go to bed .<br>%mor: pro:dem that~cop be&3S conj so pro:sub they mod can v go prep to n bed .<br>%gra: 1 2 SUBJ 2 0 ROOT 3 6 LINK 4 6 SUBJ 5 6 AUX 6 2 CJCT 7 6 JCT 8 7 POBJ 9 2 PUNCT | V3<br>V9<br>V15<br>S10<br>S12 | Point2: prep to n bed<br>Point1: mod can v go<br>Point1: mod can<br>Point1: conj so<br>Point1: pro:dem that conj so pro:sub they                                           |
| 13 | *CHI: see this guy's tired .<br>%mor: v see pro:dem this n guy~poss s part tire-PASTP .<br>%gra: 1 0 ROOT 2 3 DET 3 5 MOD 4 3 POSS 5 1 COMP 6 1 PUNCT                                                           | S11<br>S17                    | Point1: part tire-PASTP<br>Point1: part tire-PASTP                                                                                                                         |
| 14 | *CHI: I'm going to bed .<br>%mor: pro:sub I~aux be&1S part go-PRESP prep to n bed .<br>%gra: 1 3 SUBJ 2 3 AUX 3 0 ROOT 4 3 JCT 5 4 POBJ 6 3 PUNCT                                                               | V6<br>V7                      | Point1: ~aux be&1S part go-PRESP<br>Point1: part go-PRESP                                                                                                                  |
| 15 | *CHI: no maybe it broke .<br>%mor: co no adv maybe pro:per it adj broke .<br>%gra: 1 0 INCROOT 2 1 JCT 3 2 POBJ 4 3 PRED 5 1 PUNCT                                                                              |                               |                                                                                                                                                                            |
| 16 | *CHI: and this is light .<br>%mor: coord and pro:dem this cop be&3S n light .<br>%gra: 1 3 LINK 2 3 SUBJ 3 0 ROOT 4 3 PRED 5 3 PUNCT                                                                            | V15<br>Q8                     | Point2: cop be&3S<br>Point1: cop be&3S n light                                                                                                                             |

## CLAN SAMPLE TRANSCRIPT (usable child utterances only)

|    |                                                                                                                                                                                                                                                                              | Structure             | Point                                                                                                                             |
|----|------------------------------------------------------------------------------------------------------------------------------------------------------------------------------------------------------------------------------------------------------------------------------|-----------------------|-----------------------------------------------------------------------------------------------------------------------------------|
| 17 | *CHI: the light goes like this so they can see .<br>%mor: det:art  the n  light v  go-3S prep  like pro:dem  this conj  so<br>pro:sub  they mod  can v  see .<br>%gra: 1 2  DET 2 3  SUBJ 3 0  ROOT 4 3  JCT 5 4  POBJ 6 9  LINK 7 9  SUBJ 8 9  AUX<br>9 3  CJCT 10 3  PUNCT | V9<br>S6<br>S7<br>S12 | Point2: mod  can v  see<br>Point1: v  go-3S v  see<br>Point1: v  go-3S conj  so v  see<br>Point2: n  light conj  so pro:sub  they |
| 18 | *CHI: this is another light .<br>%mor: pro:dem  this cop  be&3S qn  another n  light .<br>%gra: 1 2  SUBJ 2 0  ROOT 3 4  QUANT 4 2  PRED 5 2  PUNCT                                                                                                                          |                       |                                                                                                                                   |
| 19 | *CHI: (0.3) it's not making sound .<br>%mor: pro:per  it~cop  be&3S neg  not part  make-PRESP n  sound .<br>%gra: 1 2  SUBJ 2 0  ROOT 3 2  NEG 4 2  PRED 5 4  OBJ 6 2  PUNCT                                                                                                 | N2<br>V7<br>Q3<br>Q7  | Point2: pro:per  it<br>Point2: part  make-PRESP<br>Point1: neg  not<br>Point1: ~cop  be&3S neg  not                               |
| 20 | *CHI: what phone ?<br>%mor: pro:int  what n  phone ?<br>%gra: 1 2  MOD 2 0  INCROOT 3 2  PUNCT                                                                                                                                                                               |                       |                                                                                                                                   |
| 21 | *CHI: that plugs into this .<br>%mor: pro:dem  that n  plug-PL prep  into pro:dem  this .<br>%gra: 1 2  DET 2 0  INCROOT 3 2  NJCT 4 3  POBJ 5 2  PUNCT                                                                                                                      | N7                    | Point1: n  plug-PL                                                                                                                |
| 22 | *CHI: the swing .<br>%mor: det:art  the n  swing .<br>%gra: 1 2  DET 2 0  INCROOT 3 2  PUNCT                                                                                                                                                                                 |                       |                                                                                                                                   |
| 23 | *CHI: who put it here ?<br>%mor: pro:int  who v  put&ZERO pro:per  it adv  here ?<br>%gra: 1 2  SUBJ 2 0  ROOT 3 2  OBJ 4 2  JCT 5 2  PUNCT                                                                                                                                  | Q4                    | Point2: pro:int  who v  put&ZERO                                                                                                  |
| 24 | *CHI: I got it off .<br>%mor: pro:sub  I v  get&PAST pro:per  it adv  off .<br>%gra: 1 2  SUBJ 2 0  ROOT 3 2  OBJ 4 2  JCT 5 2  PUNCT                                                                                                                                        |                       |                                                                                                                                   |
| 25 | *CHI: see ?<br>%mor: v  see ?<br>%gra: 1 0  ROOT 2 1  PUNCT                                                                                                                                                                                                                  |                       |                                                                                                                                   |
| 26 | *CHI: but it doesn't come off of it .<br>%mor: conj  but pro:per  it mod  do&3S~neg  not v  come adv  off prep  of pro:per  it .                                                                                                                                             | Q5<br>Q7              | Point1: pro:per  it ~neg  not v  come<br>Point2: mod  do&3S ~neg  not                                                             |

## CLAN SAMPLE TRANSCRIPT (usable child utterances only)

|    |                                                                                                                                                                                                     | Structure  | Point                                  |
|----|-----------------------------------------------------------------------------------------------------------------------------------------------------------------------------------------------------|------------|----------------------------------------|
|    | %gra: 1 5 LINK 2 5 SUBJ 3 5 AUX 4 3 NEG 5 0 ROOT 6 5 JCT 7 6 JCT 8 7 POBJ 9 5 PUNCT                                                                                                                 | S10<br>S19 | Point2: conj  but<br>Point1: conj  but |
| 27 | *CHI: pottie+chair .<br>%mor: n +n pottie+n chair .<br>%gra: 1 0 INCROOT 2 1 PUNCT                                                                                                                  |            |                                        |
| 28 | *CHI: that goes right there .<br>%mor: pro:rel that v go-3S adv right adv there .<br>%gra: 1 2 LINK 2 0 ROOT 3 4 JCT 4 2 JCT 5 2 PUNCT                                                              |            |                                        |
| 29 | *CHI: bath+tub .<br>%mor: n +n bath+n tub .<br>%gra: 1 0 INCROOT 2 1 PUNCT                                                                                                                          |            |                                        |
| 30 | *CHI: and this will go right here .<br>%mor: coord and pro:dem this mod will v go adv right adv here .<br>%gra: 1 4 LINK 2 4 SUBJ 3 4 AUX 4 0 ROOT 5 6 JCT 6 4 JCT 7 4 PUNCT                        |            |                                        |
| 31 | *CHI: this 0is the bath+room .<br>%mor: pro:dem this 0aux is det:art the n +n bath+n room .<br>%gra: 1 2 SUBJ 2 0 ROOT 3 4 DET 4 2 OBJ 5 2 PUNCT                                                    |            |                                        |
| 32 | *CHI: and this chair goes next to it .<br>%mor: coord and pro:dem this n chair v go-3S adv next prep to pro:per it .<br>%gra: 1 4 LINK 2 3 DET 3 4 SUBJ 4 0 ROOT 5 4 JCT 6 4 JCT 7 6 POBJ 8 4 PUNCT |            |                                        |
| 33 | *CHI: this chair goes right here .<br>%mor: pro:dem this n chair v go-3S adv right adv here .<br>%gra: 1 2 DET 2 3 SUBJ 3 0 ROOT 4 5 JCT 5 3 JCT 6 3 PUNCT                                          |            |                                        |
| 34 | *CHI: that's so people sit .<br>%mor: pro:dem that~cop be&3S adv so n person&PL v sit .<br>%gra: 1 2 SUBJ 2 0 ROOT 3 5 JCT 4 5 SUBJ 5 2 PRED 6 2 PUNCT                                              |            |                                        |
| 35 | *CHI: another chair .<br>%mor: qn another n chair .<br>%gra: 1 2 QUANT 2 0 INCROOT 3 2 PUNCT                                                                                                        |            |                                        |
| 36 | *CHI: highchair .<br>%mor: n +adj high+n chair .<br>%gra: 1 0 INCROOT 2 1 PUNCT                                                                                                                     |            |                                        |

## CLAN SAMPLE TRANSCRIPT (usable child utterances only)

|    |                                                                                                                                                                                                                                                                                                                                                                                                                           | Structure                           | Point                                                                                                                                                                                                  |
|----|---------------------------------------------------------------------------------------------------------------------------------------------------------------------------------------------------------------------------------------------------------------------------------------------------------------------------------------------------------------------------------------------------------------------------|-------------------------------------|--------------------------------------------------------------------------------------------------------------------------------------------------------------------------------------------------------|
| 37 | *CHI: and a table .<br>%mor: coord and det:art a n table .<br>%gra: 1 3 LINK 2 3 DET 3 0 INCROOT 4 3 PUNCT                                                                                                                                                                                                                                                                                                                |                                     |                                                                                                                                                                                                        |
| 38 | *CHI: this is the table for the highchair .<br>%mor: pro:dem this cop be&3S det:art the n table prep for det:art the n +adj high+n chair .<br>%gra: 1 2 SUBJ 2 0 ROOT 3 4 DET 4 2 PRED 5 4 NJCT 6 7 DET 7 5 POBJ 8 2 PUNCT                                                                                                                                                                                                | Q8                                  | Point2: cop be&3S det:art the n table                                                                                                                                                                  |
| 39 | *CHI: but this is for the big table because this is where the big people eat .<br>%mor: conj but pro:dem this cop be&3S prep for det:art the adj big n table conj because pro:dem this cop be&3S pro:rel where det:art the adj big n person&PL v eat .<br>%gra: 1 3 LINK 2 3 SUBJ 3 0 ROOT 4 3 JCT 5 7 DET 6 7 MOD 7 4 POBJ 8 10 LINK 9 10 SUBJ 10 3 CJCT 11 15 LINK 12 14 DET 13 14 MOD 14 15 SUBJ 15 10 PRED 16 3 PUNCT | N9<br>S13                           | Point1: det:art the adj big n table<br>Point1: pro:rel where det:art the adj big n person&PL (Continued from above)                                                                                    |
| 40 | *CHI: and the baby eats in the bath+room because dad said it eats down low .<br>%mor: coord and det:art the n baby v eat-3S prep in det:art the n +n bath+n room conj because n dad v say&PAST pro:per it v eat-3S adv down adj low .<br>%gra: 1 4 LINK 2 3 DET 3 4 SUBJ 4 0 ROOT 5 4 JCT 6 7 DET 7 5 POBJ 8 10 LINK 9 10 SUBJ 10 12 CJCT 11 12 SUBJ 12 4 CJCT 13 12 JCT 14 12 JCT 15 4 PUNCT                             | N10<br>V10<br>S4<br>S6<br>S7<br>S15 | Point2: adv down adj low<br>Point2: v eat-3S<br>Point1: n dad v say&PAST pro:per it<br>Point2: v eat-3S v say&PAST<br>Point2: v eat-3S conj because v say&PAST<br>Point1: v eat-3S v say&PAST v eat-3S |
| 41 | *CHI: know where that other baby crib is ?<br>%mor: v know adv:int where pro:dem that qn other n baby n crib cop be&3S ?<br>%gra: 1 0 ROOT 2 7 LINK 3 6 DET 4 5 QUANT 5 6 MOD 6 7 SUBJ 7 1 COMP 8 1 PUNCT                                                                                                                                                                                                                 | S11<br>S17                          | Point2: cop be&3S<br>Point2: cop be&3S                                                                                                                                                                 |
| 42 | *CHI: here's a ladder .<br>%mor: pro:exist here~cop be&3S det:art a n ladder .<br>%gra: 1 2 SUBJ 2 0 ROOT 3 4 DET 4 2 PRED 5 2 PUNCT                                                                                                                                                                                                                                                                                      |                                     |                                                                                                                                                                                                        |
| 43 | *CHI: it goes down doesn't it ?<br>%mor: pro:per it v go-3S adv down mod do&3S~neg not pro:per it ?<br>%gra: 1 2 SUBJ 2 0 ROOT 3 2 JCT 4 6 AUX 5 4 NEG 6 2 OBJ 7 2 PUNCT                                                                                                                                                                                                                                                  | Q11                                 | Point1: mod do&3S ~neg not pro:per it                                                                                                                                                                  |
| 44 | *CHI: yeah .<br>%mor: co yeah .<br>%gra: 1 0 INCROOT 2 1 PUNCT                                                                                                                                                                                                                                                                                                                                                            |                                     |                                                                                                                                                                                                        |

## CLAN SAMPLE TRANSCRIPT (usable child utterances only)

Structure Point

|    |                                                                                                                                                                                                                                                                                         |     |                                               |
|----|-----------------------------------------------------------------------------------------------------------------------------------------------------------------------------------------------------------------------------------------------------------------------------------------|-----|-----------------------------------------------|
| 45 | *CHI: up see ?<br>%mor: adv   up co   see ?<br>%gra: 1   2   JCT 2   0   INCROOT 3   2   PUNCT                                                                                                                                                                                          |     |                                               |
| 46 | *CHI: this is the baby .<br>%mor: pro:dem   this cop   be&3S det:art   the n   baby .<br>%gra: 1   2   SUBJ 2   0   ROOT 3   4   DET 4   2   PRED 5   2   PUNCT                                                                                                                         |     |                                               |
| 47 | *CHI: see the baby ?<br>%mor: v   see det:art   the n   baby ?<br>%gra: 1   0   ROOT 2   3   DET 3   1   OBJ 4   1   PUNCT                                                                                                                                                              |     |                                               |
| 48 | *CHI: see?<br>%mor: co   see ?<br>%xgra: 1   0   ROOT 2   1   PUNCT                                                                                                                                                                                                                     |     |                                               |
| 49 | *CHI: this is how I put it on right ?<br>%mor: pro:dem   this cop   be&3S adv:int   how pro:sub   I v   put&ZERO pro:per   it prep   on n   right ?<br>%gra: 1   2   SUBJ 2   0   ROOT 3   5   LINK 4   5   SUBJ 5   2   PRED 6   5   OBJ 7   5   JCT 8   7   POBJ 9   2   PUNCT        |     |                                               |
| 50 | *CHI: the table was right down next to them .<br>%mor: det:art   the n   table cop   be&PAST&13S adv   right adv   down adv   next prep   to pro:obj   them .<br>%gra: 1   2   DET 2   3   SUBJ 3   0   ROOT 4   5   JCT 5   3   JCT 6   3   JCT 7   6   JCT 8   7   POBJ 9   3   PUNCT | V16 | Point1: cop   be&PAST&13S                     |
| 51 | *CHI: see this is the baby .<br>%mor: v   see pro:dem   this cop   be&3S det:art   the n   baby .<br>%gra: 1   0   ROOT 2   3   SUBJ 3   1   COMP 4   5   DET 5   3   PRED 6   1   PUNCT                                                                                                |     |                                               |
| 52 | *CHI: the baby goes in it right ?<br>%mor: det:art   the n   baby v   go-3S prep   in pro:per   it n   right ?<br>%gra: 1   2   DET 2   3   SUBJ 3   0   ROOT 4   3   JCT 5   6   MOD 6   4   POBJ 7   3   PUNCT                                                                        |     |                                               |
| 53 | *CHI: what do you think this is ?<br>%mor: pro:int   what mod   do pro:per   you v   think pro:dem   this cop   be&3S ?<br>%gra: 1   4   LINK 2   4   AUX 3   4   SUBJ 4   0   ROOT 5   6   SUBJ 6   4   JCT 7   4   PUNCT                                                              | Q6  | Point2: pro:int   what mod   do               |
| 54 | *CHI: this [<] is where the bed is .                                                                                                                                                                                                                                                    | S13 | Point2: pro:rel   where det:art   the n   bed |

## CLAN SAMPLE TRANSCRIPT (usable child utterances only)

|    |                                                                                                                                                                                                                                                                                                 | Structure | Point                                                                                       |
|----|-------------------------------------------------------------------------------------------------------------------------------------------------------------------------------------------------------------------------------------------------------------------------------------------------|-----------|---------------------------------------------------------------------------------------------|
|    | %mor: pro:dem  this cop  be&3S pro:rel  where det:art  the n  bed cop  be&3S .<br>%gra: 1 2 SUBJ 2 0 ROOT 3 6 LINK 4 5 DET 5 6 SUBJ 6 2 PRED 7 2 PUNCT                                                                                                                                          |           |                                                                                             |
| 55 | *CHI: and this is where you put the highchair okay ?<br>%mor: coord  and pro:dem  this cop  be&3S pro:rel  where pro:per  you v  put&ZERO det:art  the n  +adj  high+n  chair adj  okay ?<br>%gra: 1 3 LINK 2 3 SUBJ 3 0 ROOT 4 6 LINK 5 6 SUBJ 6 3 PRED 7 8 DET 8 6 OBJ 9 8 POSTMOD 10 3 PUNCT | S4        | Point2: pro:per  you v  put&ZERO det:art  the n  +adj  high+n  chair (Continued from above) |
| 56 | *CHI: this is the light .<br>%mor: pro:dem  this cop  be&3S det:art  the n  light .<br>%gra: 1 2 SUBJ 2 0 ROOT 3 4 DET 4 2 PRED 5 2 PUNCT                                                                                                                                                       |           |                                                                                             |
| 57 | *CHI: this is the nighttime light .<br>%mor: pro:dem  this cop  be&3S det:art  the n  +n  night+n  time n  light .<br>%gra: 1 2 SUBJ 2 0 ROOT 3 5 DET 4 5 MOD 5 2 PRED 6 2 PUNCT                                                                                                                |           |                                                                                             |
| 58 | *CHI: it goes on the table .<br>%mor: pro:per  it v  go-3S prep  on det:art  the n  table .<br>%gra: 1 2 SUBJ 2 0 ROOT 3 2 JCT 4 5 DET 5 3 POBJ 6 2 PUNCT                                                                                                                                       |           |                                                                                             |
| 59 | *CHI: see that's a lot of chairs .<br>%mor: co  see pro:dem  that~cop  be&3S det:art  a n  lot prep  of n  chair-PL .<br>%gra: 1 3 COM 2 3 SUBJ 3 0 ROOT 4 5 DET 5 3 PRED 6 5 NJCT 7 6 POBJ 8 3 PUNCT                                                                                           | N7        | Point2: n  chair-PL                                                                         |
| 60 | *CHI: and this is another .<br>%mor: coord  and pro:dem  this cop  be&3S qn  another .<br>%gra: 1 3 LINK 2 3 SUBJ 3 0 ROOT 4 3 PRED 5 3 PUNCT                                                                                                                                                   |           |                                                                                             |
| 61 | *CHI: this is a pillow .<br>%mor: pro:dem  this cop  be&3S det:art  a n  pillow .<br>%gra: 1 2 SUBJ 2 0 ROOT 3 4 DET 4 2 PRED 5 2 PUNCT                                                                                                                                                         |           |                                                                                             |
| 62 | *CHI: pillow .<br>%mor: n  pillow .<br>%gra: 1 0 INCROOT 2 1 PUNCT                                                                                                                                                                                                                              |           |                                                                                             |
| 63 | *CHI: how did this come out ?<br>%mor: adv:int  how mod  do&PAST det:dem  this v  come adv  out ?<br>%gra: 1 4 LINK 2 4 AUX 3 4 SUBJ 4 0 ROOT 5 4 JCT 6 4 PUNCT                                                                                                                                 | V13       | Point1: mod  do&PAST                                                                        |
| 64 | *CHI: (0.7) this is a couch .                                                                                                                                                                                                                                                                   |           |                                                                                             |

## CLAN SAMPLE TRANSCRIPT (usable child utterances only)

|    |                                                                                                                                                                                                                                                                                                                   | Structure | Point                                                     |
|----|-------------------------------------------------------------------------------------------------------------------------------------------------------------------------------------------------------------------------------------------------------------------------------------------------------------------|-----------|-----------------------------------------------------------|
|    | %mor: pro:dem   this cop   be&3S det:art   a n   couch .<br>%gra: 1   2   SUBJ 2   0   ROOT 3   4   DET 4   2   PRED 5   2   PUNCT                                                                                                                                                                                |           |                                                           |
| 65 | *CHI: where Oare the couches gonna go ?<br>%mor: adv:int   where Oaux   are det:art   the n   couch-PL mod:aux   gonna v   go ?<br>%gra: 1   2   LINK 2   6   LINK 3   4   DET 4   6   SUBJ 5   6   AUX 6   0   ROOT 7   6   PUNCT                                                                                |           |                                                           |
| 66 | *CHI: it's going right here so people can sit .<br>%mor: pro:per   it~aux   be&3S part   go-PRESP adv   right adv   here adv   so<br>n   person&PL mod   can v   sit .<br>%gra: 1   3   SUBJ 2   3   AUX 3   0   ROOT 4   5   JCT 5   3   JCT 6   9   JCT 7   9   SUBJ 8   9   AUX<br>9   3   CJCT 10   3   PUNCT |           |                                                           |
| 67 | *CHI: it has to go in the living+room .<br>%mor: pro:per   it aux   have&3S inf   to v   go prep   in det:art   the<br>n   +n   living+n   room .<br>%gra: 1   4   SUBJ 2   4   AUX 3   4   INF 4   0   ROOT 5   4   JCT 6   7   DET 7   5   POBJ 8   4   PUNCT                                                   | V5<br>S8  | Point1: aux   have&3S inf   to v   go<br>Point1: inf   to |
| 68 | *CHI: that's the living+room right there .<br>%mor: pro:dem   that~cop   be&3S det:art   the n   +n   living+n   room adv   right<br>adv   there .<br>%gra: 1   2   SUBJ 2   0   ROOT 3   4   DET 4   2   PRED 5   6   JCT 6   4   NJCT 7   2   PUNCT                                                             |           |                                                           |
| 69 | *CHI: and this is something .<br>%mor: coord   and pro:dem   this cop   be&3S pro:indef   something .<br>%gra: 1   3   LINK 2   3   SUBJ 3   0   ROOT 4   3   PRED 5   3   PUNCT                                                                                                                                  |           |                                                           |
| 70 | *CHI: yeah.<br>%mor: co   yeah .<br>%xgra: 1   0   ROOT 2   1   PUNCT                                                                                                                                                                                                                                             |           |                                                           |
| 71 | *CHI: diaper changing+table goes in the door .<br>%mor: n   diaper n   +adj   changing+n   table v   go-3S prep   in det:art   the n   door .<br>%gra: 1   2   MOD 2   3   SUBJ 3   0   ROOT 4   3   JCT 5   6   DET 6   4   POBJ 7   3   PUNCT                                                                   |           |                                                           |
| 72 | *CHI: <going right there closed> [*] .<br>%mor: part   go-PRESP adv   right adv   there part   close-PASTP .<br>%gra: 1   0   INCROOT 2   3   JCT 3   1   JCT 4   1   XJCT 5   1   PUNCT                                                                                                                          |           |                                                           |
| 73 | *CHI: now he's working .<br>%mor: adv   now pro:sub   he~aux   be&3S part   work-PRESP .                                                                                                                                                                                                                          | V6        | Point2: ~aux   be&3S part   work-PRESP                    |



## CLAN SAMPLE TRANSCRIPT (usable child utterances only)

Structure Point

|    |                                                                                                                                                                                                                     |     |                          |
|----|---------------------------------------------------------------------------------------------------------------------------------------------------------------------------------------------------------------------|-----|--------------------------|
|    | %gra: 1 4 JCT 2 4 SUBJ 3 4 AUX 4 0 ROOT 5 4 PUNCT                                                                                                                                                                   |     |                          |
| 74 | *CHI: he's working .<br>%mor: pro:sub he~aux be&3S part work-PRESP .<br>%gra: 1 3 SUBJ 2 3 AUX 3 0 ROOT 4 3 PUNCT                                                                                                   |     |                          |
| 75 | *CHI: no working .<br>%mor: co no part work-PRESP .<br>%gra: 1 2 COM 2 0 ROOT 3 2 PUNCT                                                                                                                             |     |                          |
| 76 | *CHI: he's climbing up the ladder .<br>%mor: pro:sub he~aux be&3S part climb-PRESP prep up det:art the n ladder .<br>%gra: 1 3 SUBJ 2 3 AUX 3 0 ROOT 4 3 JCT 5 6 DET 6 4 POBJ 7 3 PUNCT                             |     |                          |
| 77 | *CHI: they work .<br>%mor: pro:sub they v work .<br>%gra: 1 2 SUBJ 2 0 ROOT 3 2 PUNCT                                                                                                                               |     |                          |
| 78 | *CHI: he's going on top of the roof .<br>%mor: pro:sub he~aux be&3S part go-PRESP prep on n top prep of det:art the n roof .<br>%gra: 1 3 SUBJ 2 3 AUX 3 0 ROOT 4 3 JCT 5 4 POBJ 6 5 NCT 7 8 DET 8 6 POBJ 9 3 PUNCT |     |                          |
| 79 | *CHI: and now he just goes back to bed .<br>%mor: coord and adv now pro:sub he adv just v go-3S adv back prep to n bed .<br>%gra: 1 5 LINK 2 5 JCT 3 5 SUBJ 4 5 JCT 5 0 ROOT 6 5 JCT 7 5 JCT 8 7 POBJ 9 5 PUNCT     | V14 | Point1: adv just v go-3S |
| 80 | *CHI: here's another baby .<br>%mor: pro:exist here~cop be&3S qn another n baby .<br>%gra: 1 2 SUBJ 2 0 ROOT 3 4 QUANT 4 2 PRED 5 2 PUNCT                                                                           |     |                          |
| 81 | *CHI: this is the baby .<br>%mor: pro:dem this v:cop be&3S det the n baby .<br>%xgra: 1 2 SUBJ 2 0 ROOT 3 4 DET 4 2 PRED 5 2 PUNCT                                                                                  |     |                          |
| 82 | *CHI: this one goes in this one .<br>%mor: pro:dem this pro:indef one v go-3S prep in pro:dem this pro:indef one .                                                                                                  |     |                          |

## CLAN SAMPLE TRANSCRIPT (usable child utterances only)

|    |                                                                                                                                                                                                                                                                                                                                                                                | Structure  | Point                                                                                              |
|----|--------------------------------------------------------------------------------------------------------------------------------------------------------------------------------------------------------------------------------------------------------------------------------------------------------------------------------------------------------------------------------|------------|----------------------------------------------------------------------------------------------------|
|    | %gra: 1 2 DET 2 3 SUBJ 3 0 ROOT 4 3 JCT 5 6 DET 6 4 POBJ 7 3 PUNCT                                                                                                                                                                                                                                                                                                             |            |                                                                                                    |
| 83 | *CHI: huh ?<br>%mor: co huh ?<br>%gra: 1 0 INCROOT 2 1 PUNCT                                                                                                                                                                                                                                                                                                                   |            |                                                                                                    |
| 84 | *CHI: this is the baby swing and this baby is done eating .<br>%mor: pro:dem this cop be&3S det:art the n baby n swing coord and<br>pro:dem this n baby aux be&3S part do&PASTP part eat-PRESP .<br>%gra: 1 2 SUBJ 2 0 ROOT 3 5 DET 4 5 MOD 5 2 PRED 6 10 LINK 7 8 DET 8 10 SUBJ<br>9 10 AUX 10 5 CMOD 11 10 OBJ 12 2 PUNCT                                                    | S16<br>S20 | Point1: part do&PASTP<br>Point1: aux be&3S part do&PASTP                                           |
| 85 | *CHI: I took him out of the highchair because he was done eating .<br>%mor: pro:sub I v take&PAST pro:obj him adv out prep of det:art the<br>n +adj high+n chair conj because pro:sub he aux be&PAST&13S<br>part do&PASTP part eat-PRESP .<br>%gra: 1 2 SUBJ 2 0 ROOT 3 2 OBJ 4 2 JCT 5 4 JCT 6 7 DET 7 5 POBJ 8 11 LINK<br>9 11 SUBJ 10 11 AUX 11 2 CJCT 12 11 OBJ 13 2 PUNCT | V13<br>S15 | Point2: aux be&PAST&13S<br>Point2: v take&PAST part do&PASTP part eat-PRESP (Continued from above) |
| 86 | *CHI: he was crying in the highchair .<br>%mor: pro:sub he aux be&PAST&13S part cry-PRESP prep in det:art the<br>n +adj high+n chair .<br>%gra: 1 3 SUBJ 2 3 AUX 3 0 ROOT 4 3 JCT 5 6 DET 6 4 POBJ 7 3 PUNCT                                                                                                                                                                   |            |                                                                                                    |
| 87 | *CHI: now he's in the swing .<br>%mor: adv now pro:sub he~cop be&3S prep in det:art the n swing .<br>%gra: 1 3 JCT 2 3 SUBJ 3 0 ROOT 4 3 JCT 5 6 DET 6 4 POBJ 7 3 PUNCT                                                                                                                                                                                                        |            |                                                                                                    |
| 88 | *CHI: now he's happy .<br>%mor: adv now pro:sub he~cop be&3S adj happy .<br>%gra: 1 3 JCT 2 3 SUBJ 3 0 ROOT 4 3 PRED 5 3 PUNCT                                                                                                                                                                                                                                                 |            |                                                                                                    |
| 89 | *CHI: he's going to the diaper changing place .<br>%mor: pro:sub he~aux be&3S part go-PRESP prep to det:art the n diaper<br>part change-PRESP n place .<br>%gra: 1 3 SUBJ 2 3 AUX 3 0 ROOT 4 3 JCT 5 6 DET 6 4 POBJ 7 3 XJCT 8 7 OBJ<br>9 3 PUNCT                                                                                                                              |            |                                                                                                    |
| 90 | *CHI: that's the bath+room .<br>%mor: pro:dem that~cop be&3S det:art the n +n bath+n room .                                                                                                                                                                                                                                                                                    |            |                                                                                                    |

## CLAN SAMPLE TRANSCRIPT (usable child utterances only)

Structure Point

|     |                                                                                                                                                                                      |     |                       |
|-----|--------------------------------------------------------------------------------------------------------------------------------------------------------------------------------------|-----|-----------------------|
|     | %gra: 1 2 SUBJ 2 0 ROOT 3 4 DET 4 2 PRED 5 2 PUNCT                                                                                                                                   |     |                       |
| 91  | *CHI: he [* 0's] drinking .<br>%mor: pro:sub  he part  drink-PRESP .<br>%gra: 1 2 SUBJ 2 0 ROOT 3 2 PUNCT                                                                            |     |                       |
| 92  | *CHI: they putting that down .<br>%mor: pro:sub  they part  put-PRESP pro:rel  that adv  down .<br>%gra: 1 0 INCROOT 2 1 PUNCT 3 2 INCROOT 4 3 JCT 5 3 PUNCT                         |     |                       |
| 93  | *CHI: they took it down .<br>%mor: pro:sub  they v  take&PAST pro:per  it adv  down .<br>%gra: 1 2 SUBJ 2 0 ROOT 3 2 OBJ 4 2 JCT 5 2 PUNCT                                           |     |                       |
| 94  | *CHI: because &uh they 0are doing this .<br>%mor: conj  because pro:sub  they 0aux  are part  do-PRESP pro:dem  this .<br>%gra: 1 4 LINK 2 4 SUBJ 3 4 AUX 4 0 ROOT 5 4 OBJ 6 4 PUNCT | S19 | Point2: conj  because |
| 95  | *CHI: see this is the baby .<br>%mor: co  see det  this v:cop  be&3S det  the n  baby .<br>%xgra: 1 3 COM 2 3 SUBJ 3 0 ROOT 4 5 DET 5 3 PRED 6 3 PUNCT                               |     |                       |
| 96  | *CHI: see that ?<br>%mor: v  see pro:dem  that ?<br>%gra: 1 0 ROOT 2 1 OBJ 3 1 PUNCT                                                                                                 |     |                       |
| 97  | *CHI: the baby's pretty good .<br>%mor: det:art  the n  baby~aux  be&3S adv  pretty adj  good .<br>%gra: 1 2 DET 2 3 SUBJ 3 0 ROOT 4 5 JCT 5 3 PRED 6 3 PUNCT                        |     |                       |
| 98  | *CHI: see, it's on top .<br>%mor: co  see cm  cm pro:per  it~aux  be&3S prep  on n  top .<br>%gra: 1 4 COM 2 1 LP 3 4 SUBJ 4 0 ROOT 5 4 JCT 6 5 POBJ 7 4 PUNCT                       |     |                       |
| 99  | *CHI: this baby .<br>%mor: pro:dem  this n  baby .<br>%gra: 1 2 DET 2 0 INCROOT 3 2 PUNCT                                                                                            |     |                       |
| 100 | *CHI: this baby is sleeping .<br>%mor: pro:dem  this n  baby aux  be&3S part  sleep-PRESP .<br>%gra: 1 2 DET 2 4 SUBJ 3 4 AUX 4 0 ROOT 5 4 PUNCT                                     |     |                       |

Q1/!2 AUTOMATICALLY SCORED
