# Supplementary material
Source: publisher figshare collection journal article supplement (https://asha.figshare.com/articles/dataset/_/11984364)
Supplement: Supplementary file 3 [file 1]

Supplemental Material S3  
IPSyn Manual Scores (based on Scarborough, 1990)

| Item | exemplar1                 | exemplar2                | Item | exemplar1                        | exemplar2                      | Item | exemplar1                            | exemplar2                      | Item | exemplar1                                                                    | exemplar2                                    |
|------|---------------------------|--------------------------|------|----------------------------------|--------------------------------|------|--------------------------------------|--------------------------------|------|------------------------------------------------------------------------------|----------------------------------------------|
| N1   | #2 closet                 | #3 table                 | V1   | V4                               | V4                             | Q1   | Q4                                   | Q4                             | S1   | S2                                                                           | S2                                           |
| N2   | #24 I                     | #12 they                 | V2   | V3                               | V3                             | Q2   | Q4                                   | Q4                             | S2   | S4                                                                           | S4                                           |
| N3   | #18 another light         | #39 big table            | V3   | #7 goes in here                  | #21 that plugs into this       | Q3   | Q5                                   | Q5                             | S3   | S4                                                                           | S4                                           |
| N4   | #2 the closet             | #38 the table            | V4   | #18 this is another light        | #46 this is the baby           | Q4   | Q6                                   | Q6                             | S4   | #10 where should be put the bed?                                             | #23 who put it here?                         |
| N5   | #3 a table                | #38 the table            | V5   | V6                               | V6                             | Q5   | Q7                                   | Q7                             | S5   | #4 and this goes like this                                                   | #39 but this is for the big table            |
| N6   | #10 put the bed           | #18 is another light     | V6   | #19 it's not making sound        | #26 doesn't come off           | Q6   | #10 where should be put the bed?     | #53 what do you think this is? | S6   | #12 that's so they can go to bed                                             | #39 because this is where the big people eat |
| N7   | #59 chairs                | #65 couches              | V7   | #19 it's not making sound        | #14 I'm going to bed           | Q7   | #19 it's not making a sound          | #26 it doesn't come off of it  | S7   |                                                                              |                                              |
| N8   | #9 the people sit         | #32 this chair goes      | V8   | #9 right here                    | #24 I got it off               | Q8   |                                      |                                | S8   | #67 it has to go in the living room                                          |                                              |
| N9   | #39 the big table         | #41 that other baby crib | V9   | #10 where should be put the bed? | #30 this will go right here    | Q9   |                                      |                                | S9   |                                                                              |                                              |
| N10  | #97 pretty good           | #6 right here            | V10  | #40 the baby eats                | #21 that plugs into this       | Q10  | #9 the people sit right here, right? | #43 it goes down, doesn't it?  | S10  | #39 because this is where the big people eat                                 | #17 the light goes like this so they can see |
| N11  | #89 diaper changing place |                          | V11  | #10 where should be put the bed? |                                | Q11  |                                      |                                | S11  | #40 because dad said it eats down low                                        | #53 what do you think this is?               |
|      |                           |                          | V12  |                                  |                                |      |                                      |                                | S12  | #39 but this is for the big table because this is where the big people eat . | #17 the light goes like this so they can see |
|      |                           |                          | V13  | #63 how did this come out?       | #86 he was crying              |      |                                      |                                | S13  | #49 this is how I put it on, right?                                          | #39 this is where the big people eat         |
|      |                           |                          | V14  | #79 and now he just goes back    | #9 the people sit right here   |      |                                      |                                | S14  |                                                                              |                                              |
|      |                           |                          | V15  |                                  |                                |      |                                      |                                | S15  | #39 because this is where the big people eat .                               | #40 because dad said it eats down low        |
|      |                           |                          | V16  | #50 the table was right down     | #85 because he was done eating |      |                                      |                                | S16  |                                                                              |                                              |
|      |                           |                          | V17  |                                  |                                |      |                                      |                                | S17  |                                                                              |                                              |
|      |                           |                          |      |                                  |                                |      |                                      |                                | S18  | #84 this baby is done eating                                                 |                                              |
|      |                           |                          |      |                                  |                                |      |                                      |                                | S19  |                                                                              |                                              |
|      |                           |                          |      |                                  |                                |      |                                      |                                | S20  |                                                                              |                                              |

Notes: #s refer to utterance numbers, shown in the transcript in Appendix A. In accordance with Scarborough (1990), If the exemplar box indicates a structure instead of an utterance, that means that points were given via cascading credit from that structure. For example, if the transcript provided an exemplar for V3, then points were automatically given for V2 as well.
